# Supplementary material for: Identifying Plasmodium falciparum transmission patterns through parasite prevalence and entomological inoculation rate
Source: eLife. 2021 Oct 21;10:e65682. doi: 10.7554/eLife.65682 (PMC8530514; doi:10.7554/eLife.65682)
Supplement: Table 1—source data 1. [file elife-65682-table1-data1.xlsx]

## Sheet: Table 1
Species	Number Collected Indoors	Number Collected Outdoors	Empirical HBR	Eperical PfSR	Empirical PfEIR
A. arabiensis	175	263	73.66	0.0548	4.04
A.funestus s.s.	74	96	28.58	0.1117	3.19
A. gambiae s.s	5	6	1.85	0.1818	0.34
A. quadriannulatus	1	3	0.67	0	0
A. ambiae s.l*	12	13	4.2	0.12	0.5
A. funustus s.l.**	4	5	1.51	0.1111	0.17
TOTAL	271	386	110.47		8.24
